# Supplementary material for: Alleviation of Hg-, Cr-, Cu-, and Zn-Induced Heavy Metals Stress by Exogenous Sodium Nitroprusside in Rice Plants
Source: MDPI journal article supplement (doi:10.3390/plants12061299), 2023-03-13
Supplement: s1 [file s1]

**Table S1.** List of primers used in this study.

| <b>Primer</b>    | <b>Forward Sequence (5'-3')</b> | <b>Reverse Sequence (5'-3')</b> |
|------------------|---------------------------------|---------------------------------|
| <i>OsActin</i>   | GGA ACT GGT ATG GTC AAG GC      | AGT CTC ATG GAT AAC CGC AG      |
| <i>OsPCS1</i>    | CGA AGA TTC CAT TTC CCA GA      | TCG AGG ATA TCG GTG AAA GC      |
| <i>OsPCS2</i>    | TCC CTC TCC GTC GTC CTC         | CCT CCG CCT TCA CCT TGT         |
| <i>OsMTP1</i>    | TCA AGA TGC TGC GCA ACA TCC     | GAG CTC CTA CTC GCG CTC AAT G   |
| <i>OsMTP5</i>    | ACG CTC GTT GTC TGA TGG G       | GTC ACT GCA AGC ATG ATG TCC AC  |
| <i>OsMT-I-1a</i> | TGC GGA AG TAC CCT GA           | TTC TCC GGC GCC ACA C           |
| <i>OsMT-I-1b</i> | CTG TGG ATC AAG CTG TGG CT      | GCT GCT GCT CTT CTC TTC CA      |
